# Supplementary material for: Hardwiring tissue-specific AAV transduction in mice through engineered receptor expression
Source: Springer Nature journal article supplement (doi:10.1038/s41592-023-01896-x), 2023-06-08
Supplement: MOESM1 [file 41592_2023_1896_MOESM1_ESM.pdf]

# Hardwiring tissue-specific AAV transduction in mice through engineered receptor expression

---

In the format provided by the  
authors and unedited

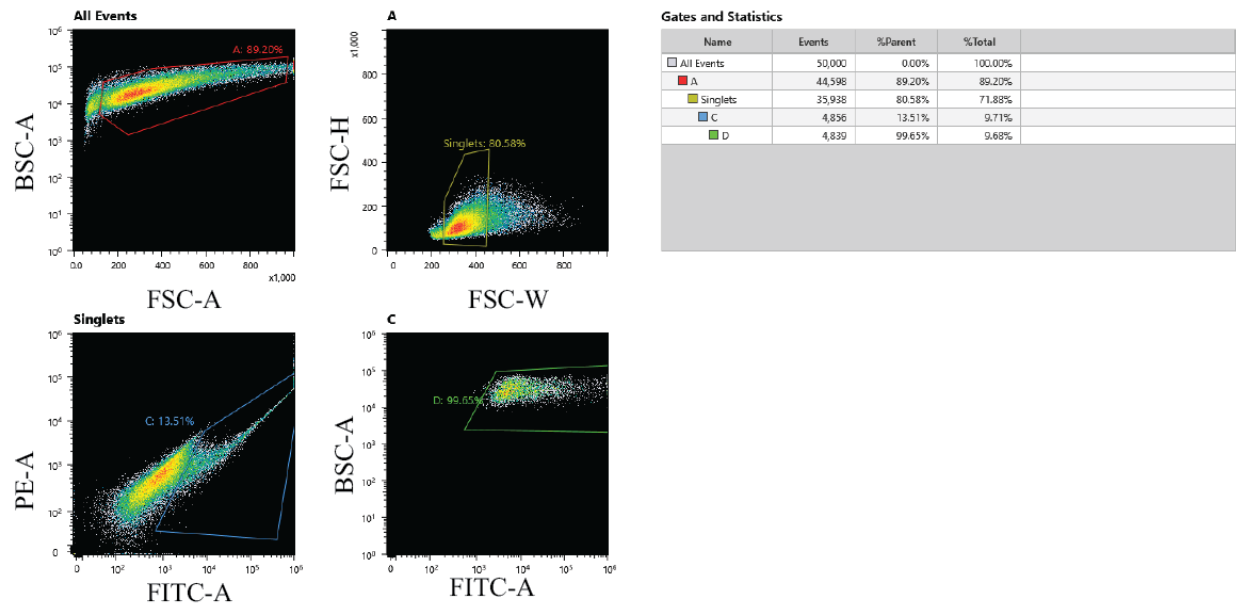

**Supplementary Figure 1: Gating strategy for transduction experiments FACS.** **a**, MEFs transduced with AAV9-sgRNA-PCSK9-GFP were sorted to isolate the GFP<sup>+</sup> population. FSC and SSC were used to identify single cells and GFP<sup>+</sup> cells were gated based on a comparison to untransduced cells.

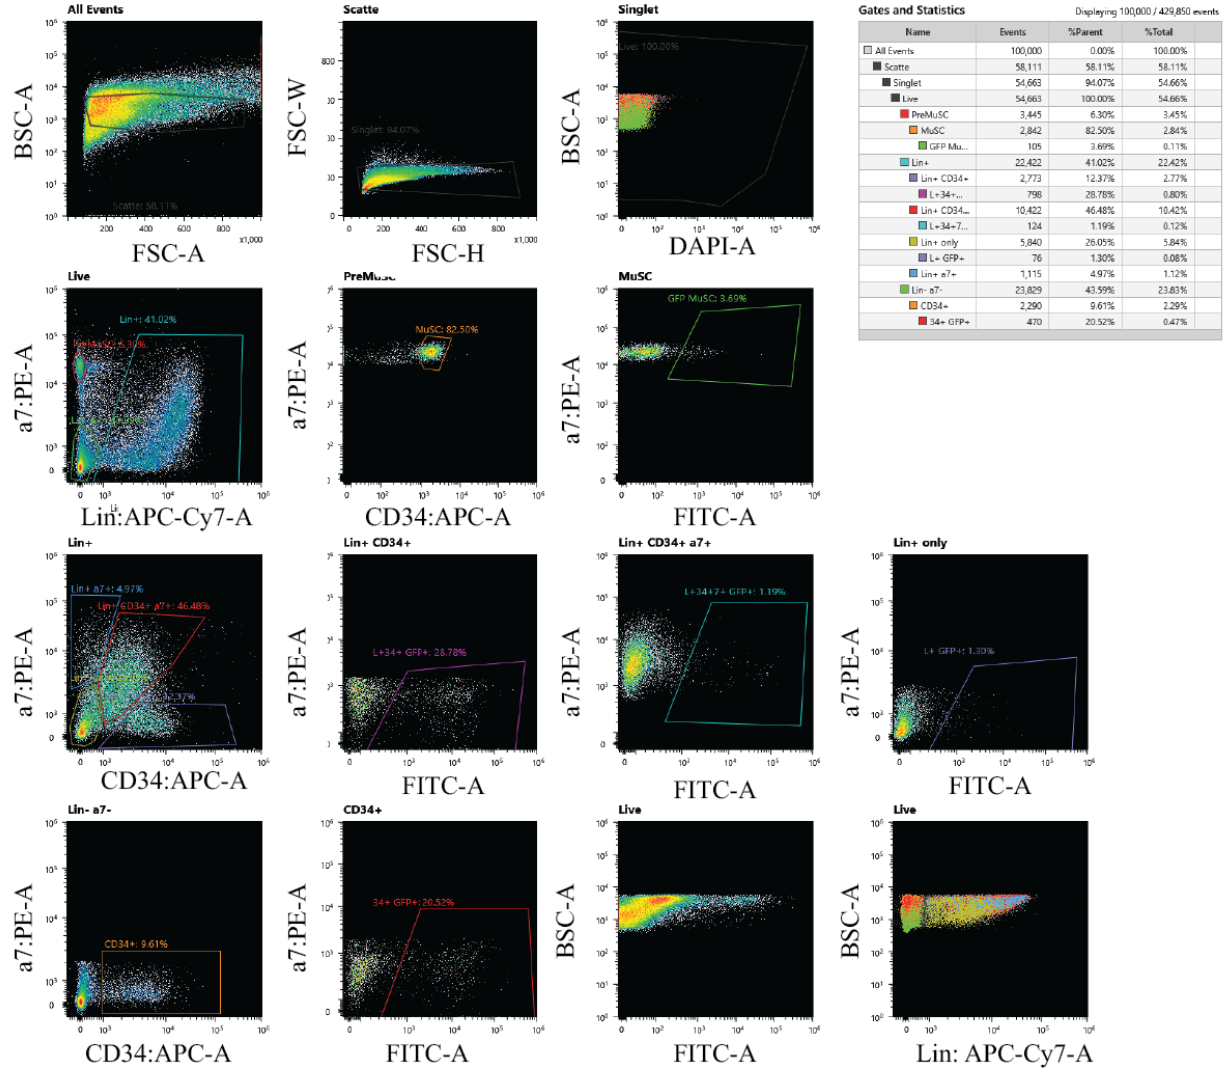

**Supplementary Figure 2:** MuSCs were isolated from TA muscle and diaphragm of mice and digested to get a single cell suspension. Live mononuclear cells dissociated from AAV injected muscles were gated by FSC-A vs. SSC-A to remove low and high SSC debris. Then singlets were selected for by gating on FSC-w and FSC-h. Live cells were selected based on low DAPI signal. MuSCs were enriched by gating for a7-PE positivity and lineage marker (CD45-PE-Cy7, CD11b-PE-Cy7, CD31-PE-Cy7) negativity and further selected by gating on CD34-APC positive and SSC-A low populations. Based on previous data, this strategy yields MuSCs at >95% purity based on Pax7+ staining. Antibody gates and compensation were established using unstained, single stained, and FMO controls. GFP gates were established on untransduced cells or tissues.

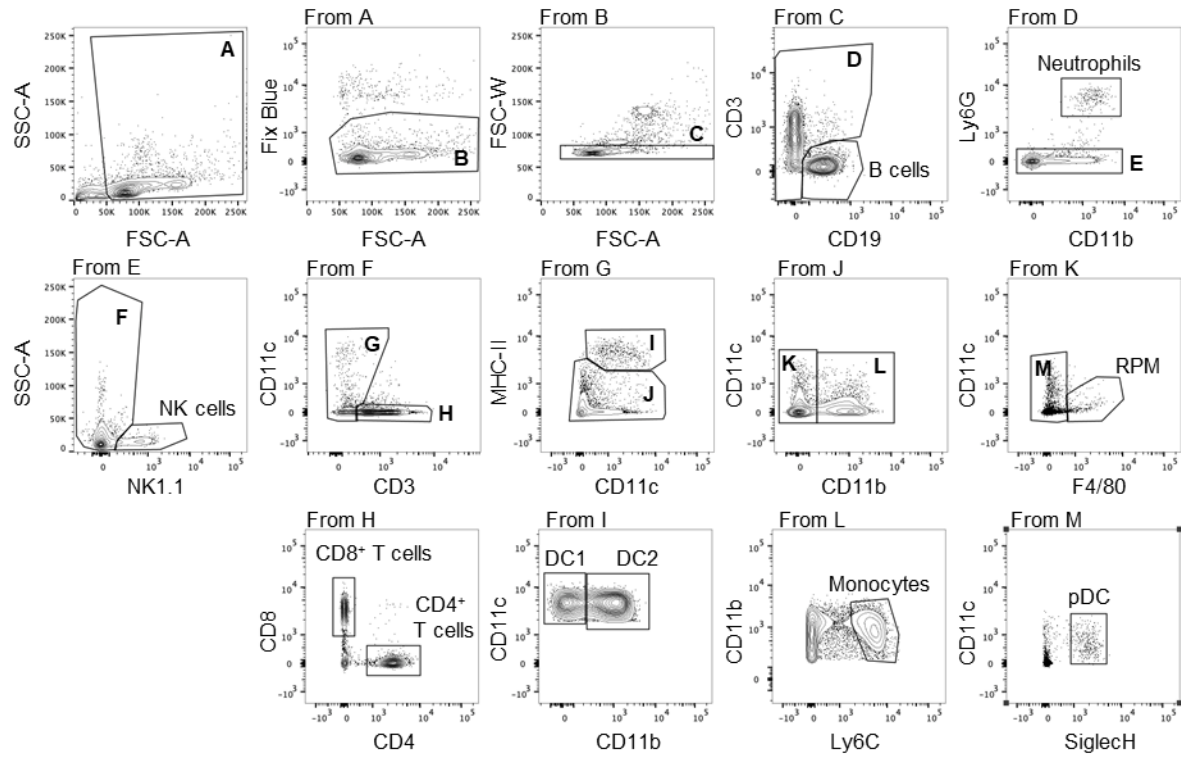

**Supplementary Figure 3:** Gating strategy for immune cell identification using FACS. Live cells were gated from the Fix Blue negative population, followed by singlet gating. Cell types were identified as outlined: B-cell (CD19<sup>+</sup>, CD3<sup>-</sup>), Neutrophil (CD11b<sup>+</sup>, Ly6G<sup>+</sup>), NK cells (NK1.1<sup>+</sup>), CD8<sup>+</sup> T cells (CD3<sup>+</sup>, CD8<sup>+</sup>), CD4<sup>+</sup> T cells (CD3<sup>+</sup>, CD4<sup>+</sup>), DC1 (MHC-II<sup>+</sup>, CD11c<sup>+</sup>, CD11b<sup>-</sup>), DC2 (MHC-II<sup>+</sup>, CD11c<sup>+</sup>, CD11b<sup>+</sup>), Monocytes (CD11b<sup>+</sup>, Ly6C<sup>+</sup>), RPM (CD11b<sup>-</sup>, F4/80<sup>+</sup>), pDC (F4/80<sup>-</sup>, Siglec<sup>+</sup>). Population frequency was identified and reported in Extended Data Fig. 2c. DC populations were combined to simplify reporting of immune cell phenotype.
